# Supplementary material for: Ketogenic Diet Protects from Experimental Colitis in a Mouse Model Regardless of Dietary Fat Source
Source: MDPI journal article supplement (doi:10.3390/nu16091348), 2024-04-29
Supplement: s1 [file s1]

## Supplementary material

**Table S1.** Formulations of study diets. CD = control diet, SFA-KD = ketogenic diet with saturated fatty acids, LA-KD = ketogenic diet with linoleic acid.

|                                                      | <b>CD</b><br>TD.220115 | <b>SFA-KD</b><br>TD.220117.PWD | <b>LA-KD</b><br>TD.220116.PWD |
|------------------------------------------------------|------------------------|--------------------------------|-------------------------------|
| <b>Ingredient</b>                                    | <b>g/kg</b>            | <b>g/kg</b>                    | <b>g/kg</b>                   |
| Casein                                               | 100.0                  | 180.0                          | 180.0                         |
| DL-Methionine                                        | 1.6                    | 2.88                           | 2.88                          |
| Corn Starch                                          | 512.46                 | 0                              | 0                             |
| Sucrose                                              | 100.0                  | 0                              | 0                             |
| Maltodextrin                                         | 155.0                  | 0                              | 0                             |
| Vegetable Shortening                                 | 25.0                   | 0                              | 590.0                         |
| Safflower Oil                                        | 25.0                   | 0                              | 85.0                          |
| Cellulose                                            | 44.648                 | 70.206                         | 70.164                        |
| Mineral Mix, w/o Ca & P (98057)                      | 13.4                   | 24.8                           | 24.8                          |
| Calcium Phosphate, dibasic                           | 10.1                   | 18.6                           | 18.6                          |
| Calcium Carbonate                                    | 5.0                    | 9.4                            | 9.4                           |
| Vitamin Mix, w/o choline, A, D, E (83171)            | 5.0                    | 13.875                         | 13.875                        |
| Choline Bitartrate                                   | 2.5                    | 4.625                          | 4.625                         |
| Vitamin E, DL-alpha tocopheryl acetate (500 IU/g)    | 0.225                  | 0.41                           | 0.41                          |
| Vitamin A, palmitate (500,000 IU/g)                  | 0.027                  | 0.008                          | 0.05                          |
| Vitamin D3, cholecalciferol (50,000 IU/g in sucrose) | 0.03                   | 0.056                          | 0.056                         |
| TBHQ, antioxidant                                    | 0.01                   |                                | 0.14                          |
| Anhydrous Milkfat                                    |                        | 675.0                          |                               |
| Ethoxyquin, antioxidant                              |                        | 0.14                           |                               |

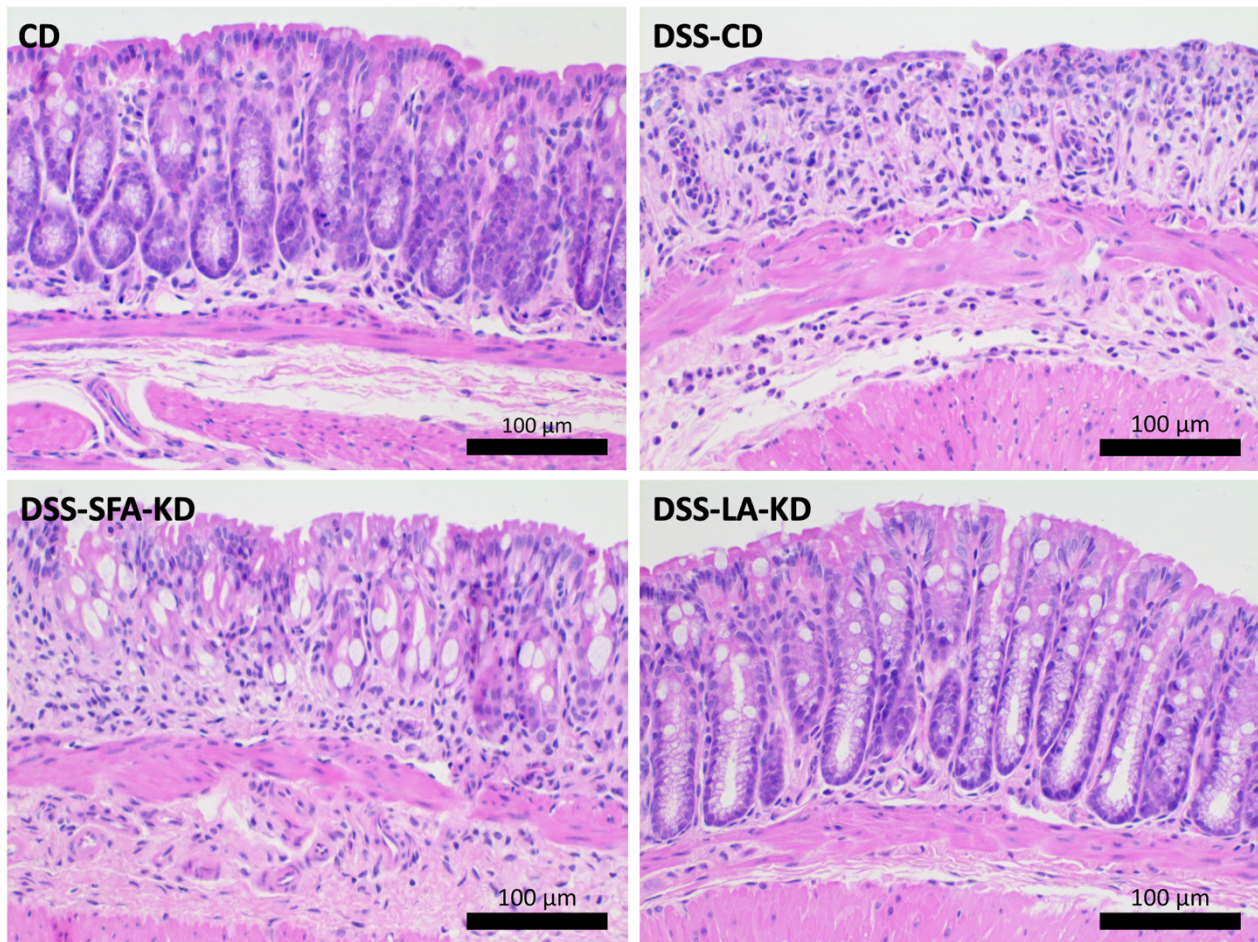

**Figure S1.** Original microphotographs of HE-stained colon sections. CD = healthy group with control diet, DSS-CD = DSS group with control diet, DSS-LA-KD = DSS group with diet high in linoleic acid, DSS-SFA-KD = DSS group with diet high in saturated fatty acids, HE = hematoxylin and eosin.

A

Claudin-1 and occludin

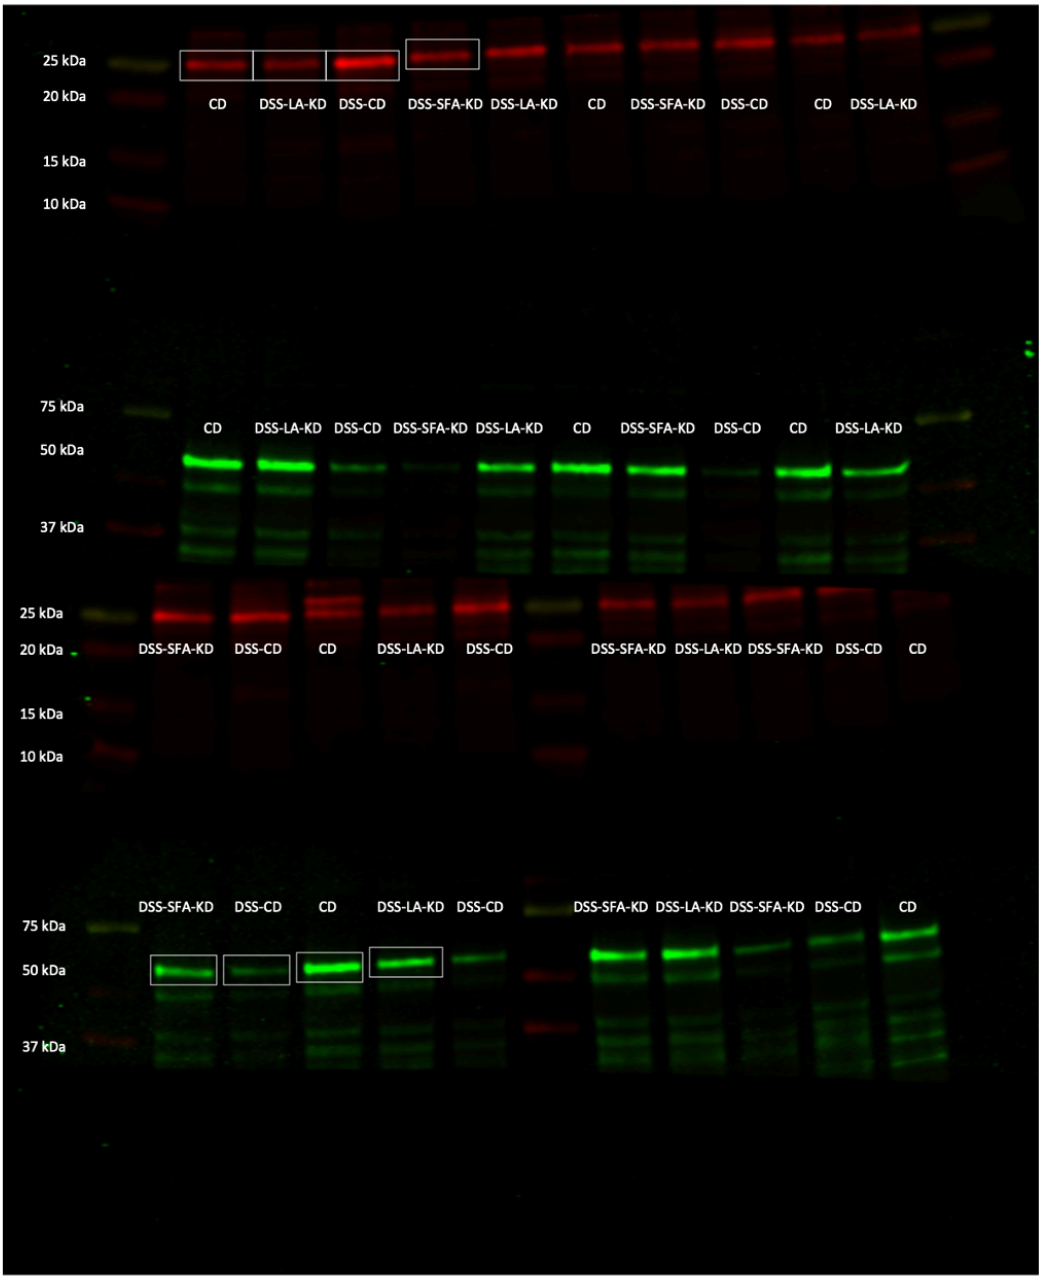

## Total protein for claudin-1 and occludin

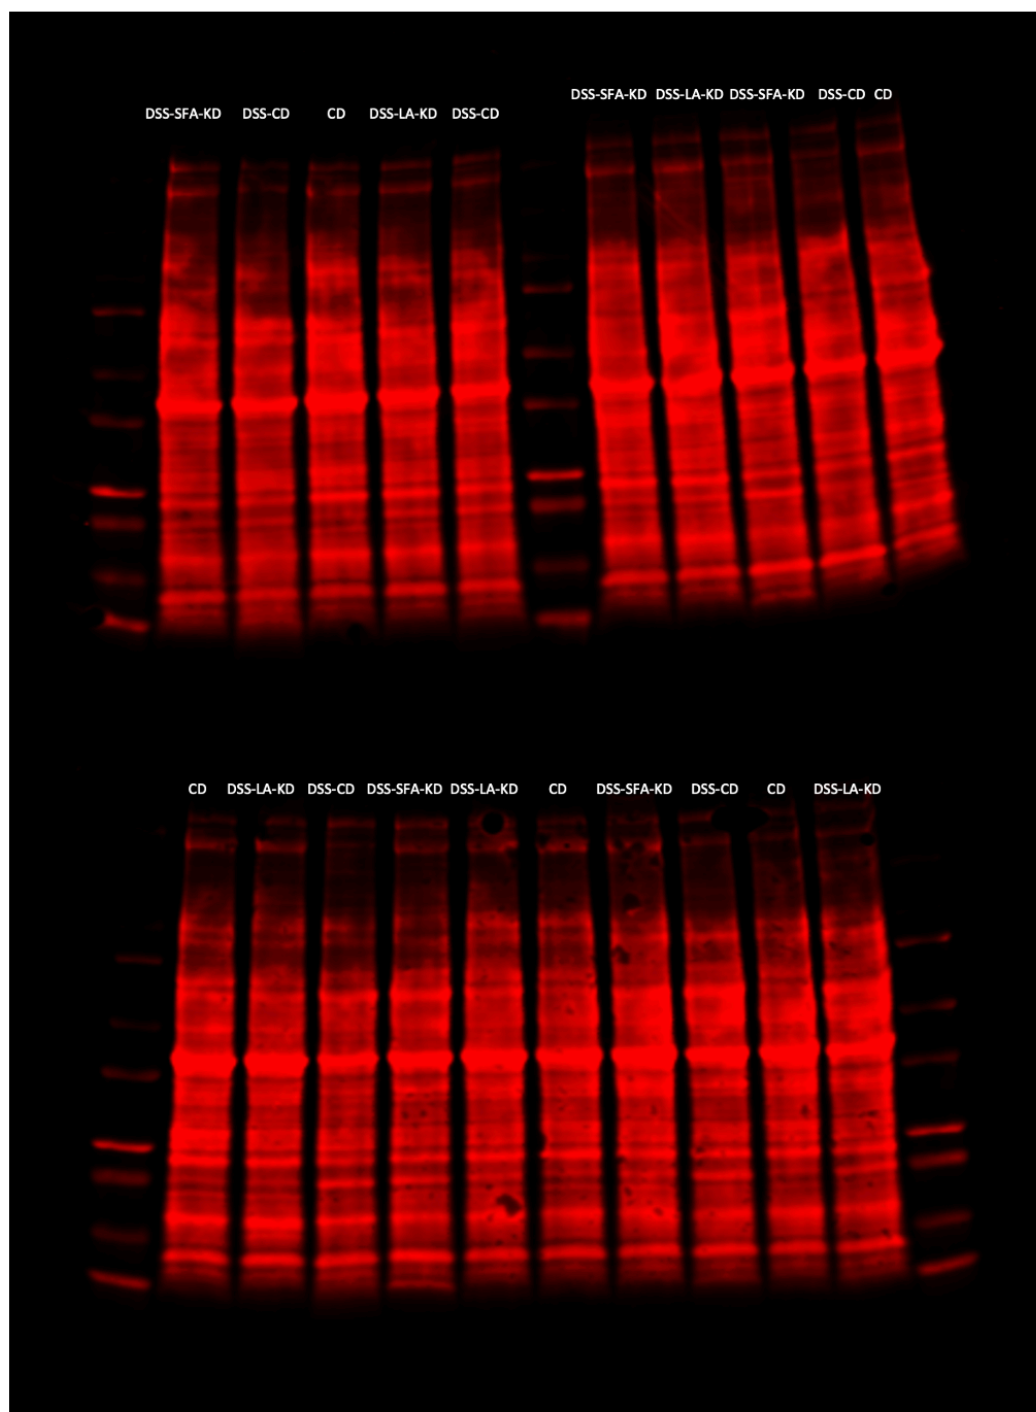

B

Claudin-2

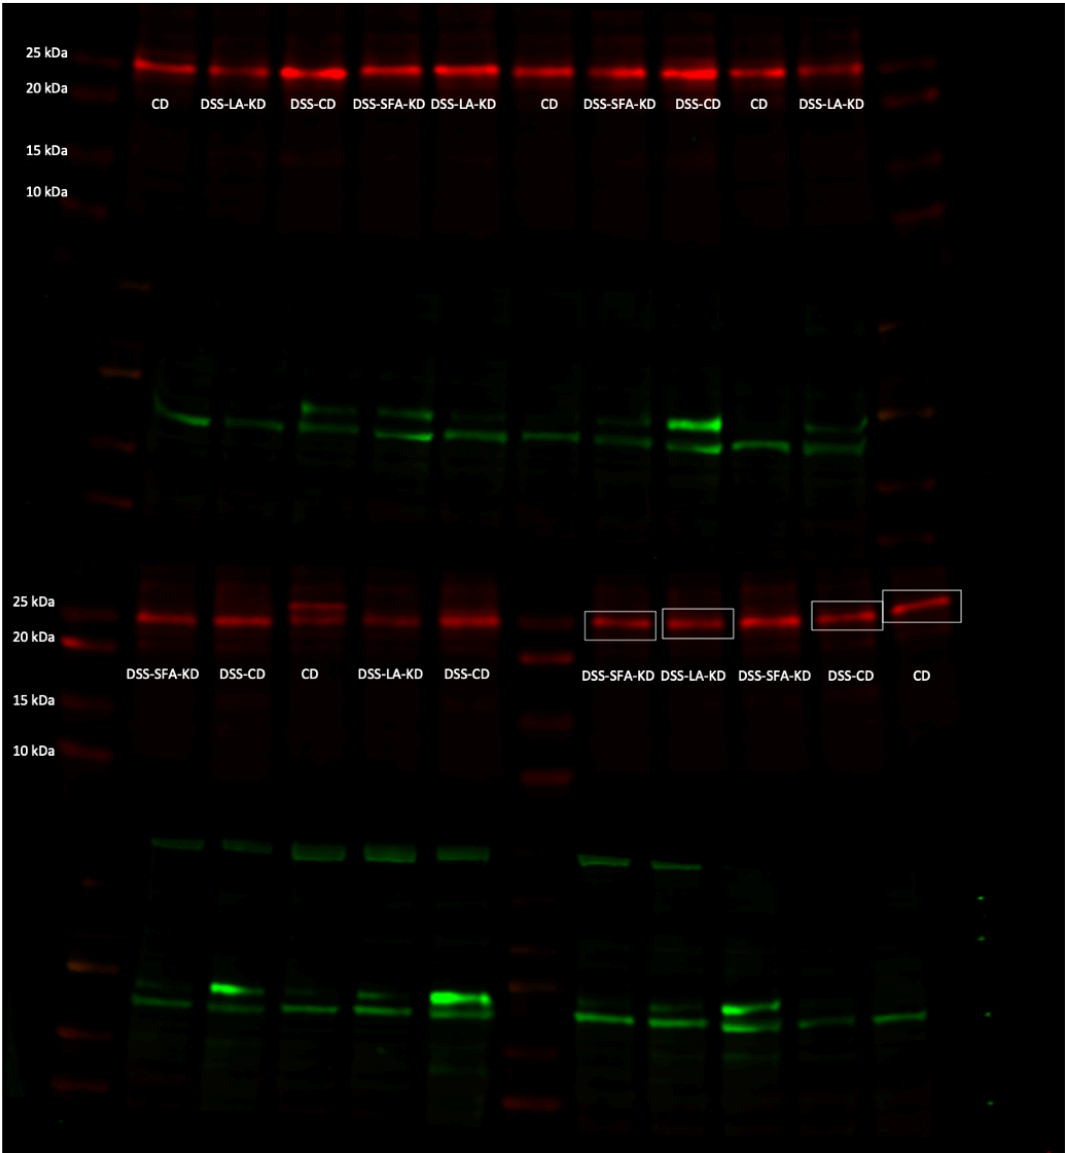

## Total protein for claudin-2

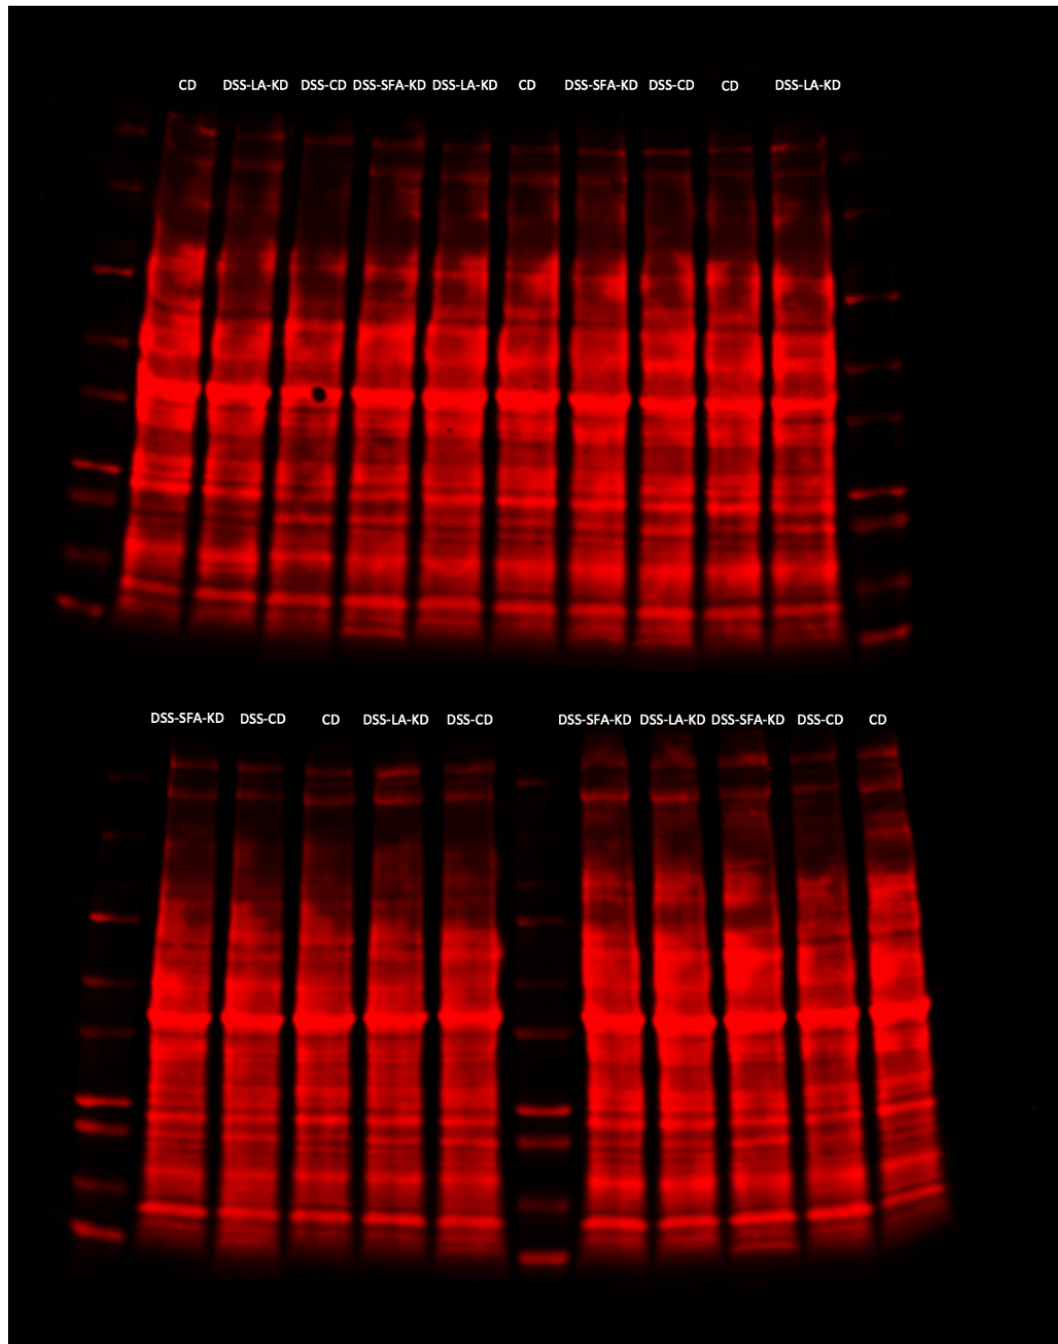

**C****Claudin-4**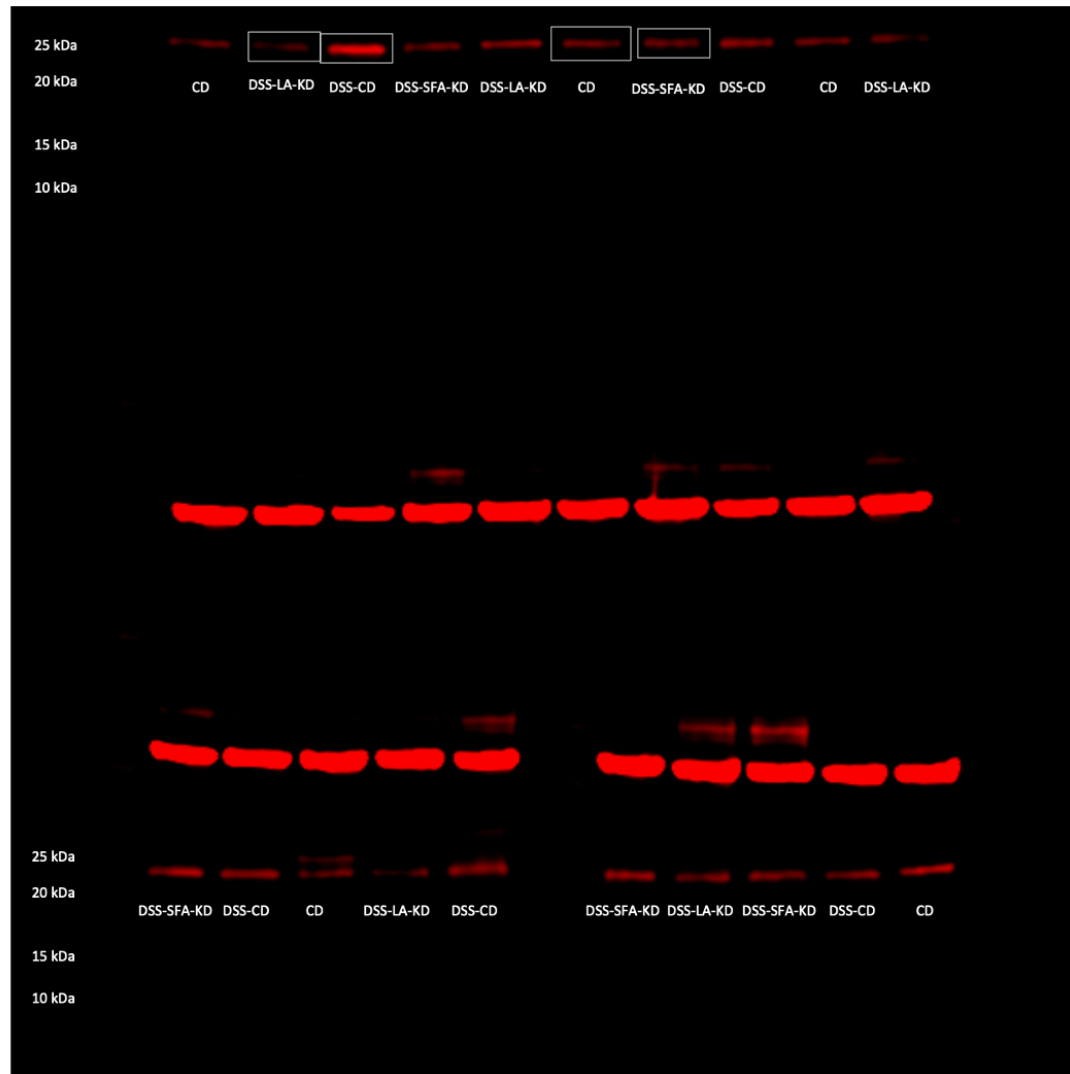

## Total protein for claudin-4

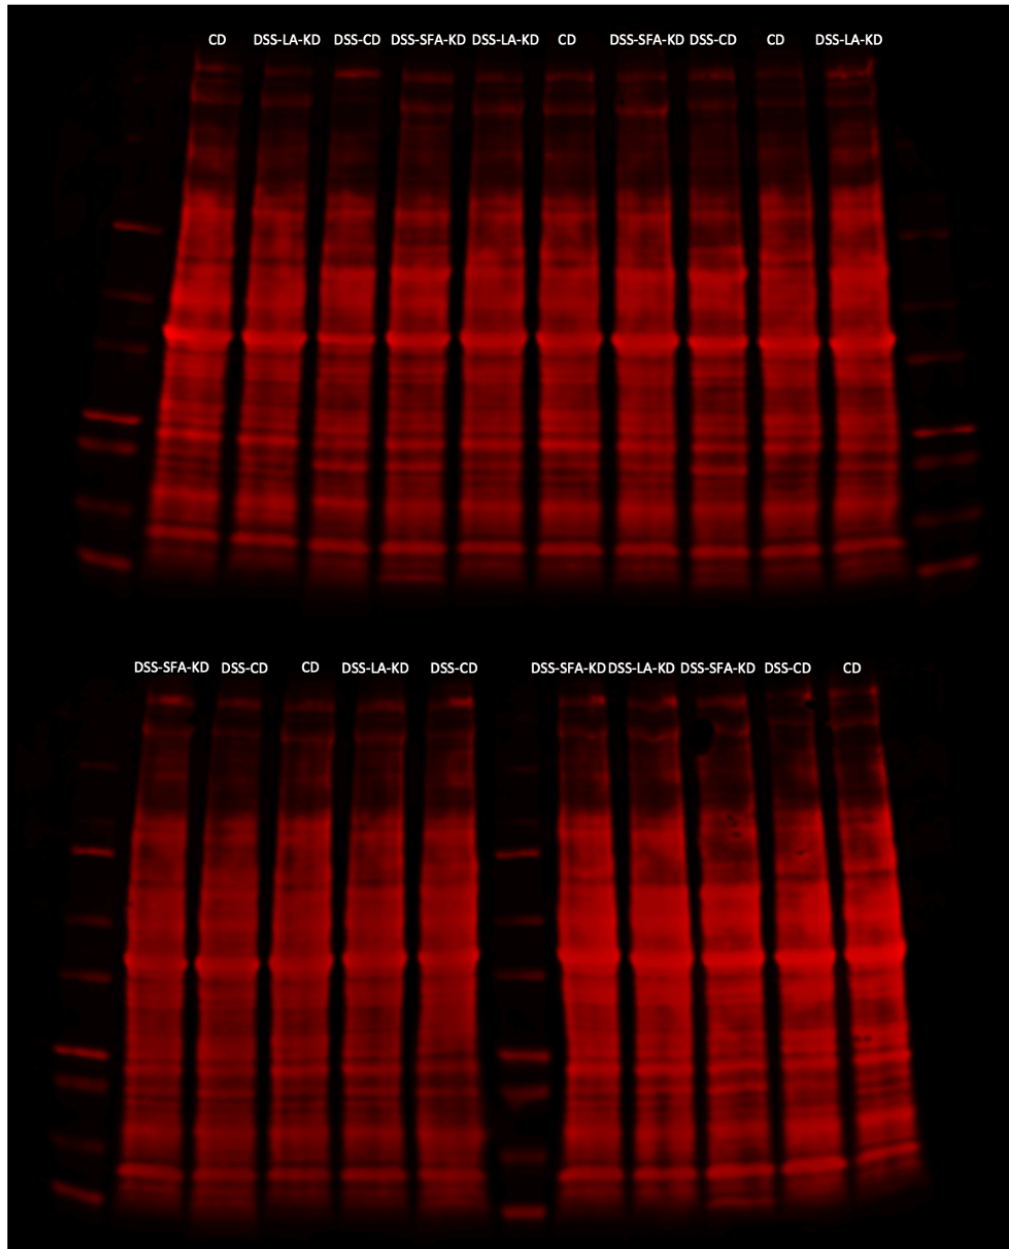

**Figure S2.** Original and unmodified Western Blot images of colonic tight junction proteins. A. Claudin-1 and occludin, B. claudin-2, C. claudin-4 and total protein. The bands presented in the manuscript are circled. CD = healthy group with control diet, DSS-CD = DSS group with control diet, DSS-LA-KD = DSS group with diet high in linoleic acid, DSS-SFA-KD = DSS group with diet high in saturated fatty acids.
